# Supplementary material for: Medicaid Enrollment following the ACA Eligibility Expansion among Persons using Homelessness Services: An interrupted time-series analysis
Source: Research Square preprint supplement (doi:10.21203/rs.3.rs-6247440/v1), 2025-09-01
Supplement: Supplementary file 1 [file 23bacda802fdc05a6ff5a485.docx]

SUPPLEMENTAL TABLE 1 US Housing and Urban Development Homelessness Management Information System manual, definitions of project types classified by “homelessness assistance services”

| **Program Description** | **US Housing and Urban Development Manual Definition of Program Services (i.e., “Project Type”)** |
| --- | --- |
| ***HMIS Recorded Homelessness assistance servicesProject Type*** | |
| Coordinated Entry | *A project that administers the continuum's centralized or coordinated process to coordinate assessment and referral of individuals and families seeking housing or services, including use of a comprehensive and standardized assessment tool.* |
| Day Shelter | *A project that offers daytime facilities and services (no lodging) for persons who are homeless.* |
| Emergency Shelter | *A project that offers temporary shelter (lodging) for the homeless in general or for specific populations of the homeless. Requirements and limitations may vary by program and will be specified by the funder.* |
| Safe Haven | *A project that offers supportive housing that (1) serves hard to reach homeless persons with severe mental illness who came from the streets and have been unwilling or unable to participate in supportive services; (2) provides 24-hour residence for eligible persons for an unspecified period; (3) has an overnight capacity limited to 25 or fewer persons; and (4) provides low demand services and referrals for the residents.* |
| Street Outreach | *A project that offers services necessary to reach out to unsheltered homeless persons, connect them with emergency shelter, housing, or critical services, and provide urgent, non-facility-based care to unsheltered homeless persons who are unwilling or unable to access emergency shelter, housing, or an appropriate health facility. Only persons who are "street homeless” should be entered into a street outreach project. Projects that also serve persons other than “street homeless” must have two separate projects to be set up in HMIS, one 'Street Outreach' and the other 'Services Only.'* |
| Transitional Housing | *A project that provides temporary lodging and is designed to facilitate the movement of homeless individuals and families into permanent housing within a specified period of time, but no longer than 24 months. Requirements and limitations may vary by program and will be specified by the funder.* |
| ***Permanent Housing Service Types*** | |
| Permanent Housing - Housing Only | *A project that offers permanent housing for persons who are homeless, but does not make supportive services available as part of the project.* |
| Permanent Housing - Housing with Services | *[No disability required for entry] A project that offers permanent housing and supportive services to assist persons to live independently, but does not limit eligibility to individuations with disabilities or families in which one adult or child has a disability.* |
| Permanent Housing - Permanent Supportive Housing | *[Disability required for entry] A project that offers permanent housing and supportive services to assist homeless persons with a disability (individuals with disabilities or families in which one adult or child has a disability) to live independently.* |
| Permanent Housing - Rapid Re-Housing | *A permanent housing project that provides housing relocation and stabilization services and short- and/or medium term rental assistance as necessary to help a homeless individual or family move as quickly as possible into permanent housing and achieve stability in that housing.* |
| ***All Other HMIS Project Services Project Types*** | |
| Homelessness Prevention | *A project that offers services and/or financial assistance necessary to prevent a person from moving into an emergency shelter or place not meant for human habitation.* |
| Other | *A project that offers services, but does not provide lodging, and cannot otherwise be categorized as another project type, per above. Any project that provides only stand-alone supportive services (other than outreach or coordinated entry) and has no associated housing outcomes should be typed as 'Other.' For example, a project funded to provide child care for persons in permanent housing or a dental care project funded to serve homeless clients should be typed 'Other.' A project funded to provide ongoing case management with associated housing outcomes should be typed 'Services Only.'* |
| Services Only Program | *A project that offers only stand-alone supportive services (other than outreach or coordinated entry) to address the special needs of participants (such as child care, employment assistance, and transportation services) and has associated housing outcomes.*  *If the Services Only project is affiliated with any one of the following:*  *1 One residential project AND Does not offer to provide services for all the residential project clients;*  *1a OR • Only serves clients for a portion of their project stay (e.g.: provides classes);*  *1b OR • Information sharing is not allowed between residential project and service provider.*  *2 Multiple residential projects of the same project type (e.g. multiple PH:PSH) AND • Does not serve all the residential project clients; OR• Information sharing is not allowed between residential projects and service provider.*  *3 Multiple residential projects of different project types (e.g. PH:RRH and PH:PSH)*  *4 Emergency Shelter(s)*  *Then the project type will be 'Services Only' and 'Affiliated with a Residential Project' will be 'Yes.' Each of the residential projects with which the Services Only project is associated must be identified.*  *If the Services Only project provides only services (other than outreach or coordinated entry), has associated housing outcomes, and is not limited to serving clients of one or more specific residential projects, then the project type will be 'Services Only' and 'Affiliated with a Residential project' will be 'No.' A residential project that is funded under one or more separate grants to provide supportive services to 100% of the clients of the residential project will be set up as a single project with the appropriate residential project type. All [that] provide supportive services to 100% of the clients of the residential project will be set up as a single project with the appropriate residential project type. All federal funding sources must be identified in 2.06 Funding Sources.* |
| Source: U.S. Department of Housing and Urban Development. *FY 2022 HMIS Data Standards (Manual), v. 1.3.* U.S. Department of Housing and Urban Development; 2021, p. 39-45). Abbreviations: HMIS, Homeless Management Information System.  Notes: List of homelessness assistance services determined in consultation with HMIS/housing subject matter experts; Numbering added for clarity. “Permanent Housing” project types were only included in sensitivity analysis (Supplemental Digital Content 2). | |

SUPPLEMENTAL TABLE 2 Interrupted time series analyses of the ACA Medicaid eligibility expansion on Medicaid enrollment among persons experiencing or at-risk of homelessness in NJ and PA, 2011-2016**,** including clients utilizing Permanent Supportive Housing

|  | NJ | | PA | |
| --- | --- | --- | --- | --- |
| Model (Likelihood of Medicaid Enrollment) | Coefficient (95% CI) | *P* | Coefficient (95% CI) | *P* |
| [β1] Level change post-expansion | 0.074 | *** | 0.089 | *** |
|  | (0.044-0.104) |  | (0.064-0.114) |  |
| [β3] Change in monthly trend post-expansion (per month) | 0.006 | *** | 0.002 | .312 |
|  | (0.004-0.008) |  | (-0.002 to 0.005) |  |
| [β2] Monthly trend (per month) | -0.001 | .067 | 0.004 | .034 |
|  | (-0.002 to 0) |  | (0-0.008) |  |
| Homelessness assistance services per year |  |  |  |  |
| [β4] *1 month with homelessness assistance services* | 0.142 | *** | 0.015 | .232 |
|  | (0.093-0.195) |  | (-0.010 to 0.039) |  |
| [β5] *2+ months with homelessness assistance services* | 0.180 | *** | 0.076 | *** |
|  | (0.122-0.239) |  | (0.047-0.105) |  |
| Race/ethnicity (white NH reference) |  |  |  |  |
| 1] *Asian and other racial/ethnic groups, NH* | -0.060 | .007 | -0.043 | .031 |
|  | (-0.105 to -0.019) |  | (-0.082 to -0.004) |  |
| 2] *Black/African American, NH* | 0.007 | .502 | -0.023 | *** |
|  | (-0.015-0.031) |  | (-0.035 to -0.011) |  |
| 3] *Hispanic* | -0.035 | .021 | -0.016 | .417 |
| Race/ethnicity (white NH reference) | (-0.064 to -0.004) |  | (-0.054-0.023) |  |
| 4] Age | -0.001 | .019 | 0.000 | .624 |
|  | (-0.002 to -0) |  | (0-0.001) |  |
| 5] Female (male or non-binary reference) | 0.124 | *** | 0.175 | *** |
|  | (0.108-0.140) |  | (0.160-0.189) |  |
| [β6] Level change after January 2016 | 0.005 | .619 | -0.017 | .096 |
|  | (-0.017-0.029) |  | (-0.036-0.003) |  |
| [β7] Change in monthly trend after January 2016 (per month) | -0.019 | *** | -0.003 | *** |
|  | (-0.026 to -0.013) |  | (-0.006 to -0.001) |  |
| Constant | 0.402 | *** | 0.258 | *** |
|  | (33.4-0.468) |  | (0.088-0.427) |  |
| Observations | 284 761 |  | 45 635 |  |
| R-squared | .054 |  | .114 |  |
| Source: Authors’ analysis of linked HMIS and MMIS data in NJ and PA (see text). Abbreviations: NJ, New Jersey; PA, Pennsylvania; HMIS, Homeless Management Information System; MMIS, Medicaid Management Information System; NH, Non-Hispanic. Notes: Robust standard errors in parentheses. *** indicates *P*<0.001. Due to small sample sizes, the “Asian and other racial/ethnic groups” category includes Asian, American Indian, Alaskan native, Pacific Islander, and multiple races. | | | | |

SUPPLEMENTAL TABLE 3. HUD-Reported Point-in-Time Estimates of Overall Homelessness in New Jersey and Pennsylvania, 2011-2016

| **Year** | **NJ** | **PA** |
| --- | --- | --- |
| 2011 | 14,137 | 15,096 |
| 2012 | 13,025 | 14,736 |
| 2013 | 12,002 | 15,086 |
| 2014 | 11,671 | 15,333 |
| 2015 | 10,098 | 15,421 |
| 2016 | 8,895 | 15,339 |
| Source: US Housing and Urban Development [2024], “2007-2023 PIT Counts by State”; Authors’ analysis. | | |

|  |
| --- |

SUPPLEMENTAL FIGURE 1. Housing Inventory Count, Total Year-Round Beds (Emergency Shelter, Transitional Housing, and Safe Haven) in New Jersey and Pennsylvania, 2011-2016. Source: US Housing and Urban Development (2024), “2007-2023 Housing Inventory Counts by State”; Authors’ analysis.
